# Supplementary material
Source: ML conference proceedings conference paper supplement (https://openreview.net/forum?id=kAfl36VUr95)
Supplement: supplementary_material [file attachment]

## A APPENDIX

The appendix is divided into three parts. We first introduce some preliminaries before giving detailed proof of the main results. We finally discuss more details for truncated mechanisms.

### A.1 PRELIMINARIES

We give some specific forms of operator  $T$  in KM iteration in Table 1. The SGD, SPGD and ADMM algorithms are the special cases of KM iteration.

Table 1: Overview of several first-order algorithms

| Algorithm | Operator identity ( $T$ )                                                                                 | Subgradient identity                                                                                                    |
|-----------|-----------------------------------------------------------------------------------------------------------|-------------------------------------------------------------------------------------------------------------------------|
| SGD       | $I - \gamma \nabla f$                                                                                     | $x^{k+1} = \mathbf{W}x^k - \gamma_k \nabla f(x^k)$                                                                      |
| SPGD      | $(I + \gamma \partial g)^{-1} (I - \gamma \nabla f)$                                                      | $x^{k+1} = \mathbf{W}x^k + (\text{prox}_{\gamma_k g} (I - \gamma_k \nabla f(x^k)) - x^k)$                               |
| ADMM      | $(I + \gamma \partial f)^{-1} [(I + \gamma \partial g)^{-1} (I - \gamma \partial f) + \gamma \partial f]$ | $x^{k+1} = \mathbf{W}x^k + \frac{1}{2} \text{refl}_{\gamma_k \partial f} \circ \text{refl}_{\gamma_k \partial g} (x^k)$ |

Table 2 concludes the sensitivity for different typologies in decentralized learning when the step size is chosen as  $\alpha_k = \alpha$  and  $\alpha_k = 1/(k+1)$ .

Table 2:  $\Delta_K$ -Sensitivity under Different Graph Typologies

| Graph typology | Spectral gap ( $1-\lambda$ )       | Sensitivity ( $\alpha_k = \alpha$ )                     | Sensitivity ( $\alpha_k = 1/(k+1)$ )                |
|----------------|------------------------------------|---------------------------------------------------------|-----------------------------------------------------|
| Ring           | $\mathcal{O}(\frac{1}{M^2})$       | $\mathcal{O}(\frac{\alpha K}{MN} + M^2 \alpha K)$       | $\mathcal{O}(\frac{\ln(K)}{MN}) + M^2 \ln(K)$       |
| Grid           | $\mathcal{O}(\frac{1}{M \log(M)})$ | $\mathcal{O}(\frac{\alpha K}{MN} + M \log(M) \alpha K)$ | $\mathcal{O}(\frac{\ln(K)}{MN}) + M \log(M) \ln(K)$ |
| Star           | $\mathcal{O}(\frac{1}{M})$         | $\mathcal{O}(\frac{\alpha K}{MN} + M \alpha K)$         | $\mathcal{O}(\frac{\ln(K)}{MN}) + M \ln(K)$         |
| Exponential    | $\mathcal{O}(\frac{1}{\log(M)})$   | $\mathcal{O}(\frac{\alpha K}{MN} + \log(M) \alpha K)$   | $\mathcal{O}(\frac{\ln(K)}{MN}) + \log(M) \ln(K)$   |
| Full connected | 1                                  | $\mathcal{O}(\frac{\alpha K}{MN} + \alpha K)$           | $\mathcal{O}(\frac{\ln(K)}{MN}) + \ln(K)$           |

We know that the connection between local servers is described by a mixing matrix  $\mathbf{W}$  for different topologies. The mixing matrix has a special property given in Lemma 1.

**Lemma 1 (Convergence of Mixing Matrix Zhu et al. (2022))** *Let  $\mathbf{P} \in \mathbb{R}^{M \times M}$  be a matrix whose elements are all  $1/M$ . Given any  $t \in \mathbb{Z}^+$ , the mixing matrix  $\mathbf{W} \in \mathbb{R}^{M \times M}$  satisfies,*

$$\|\mathbf{W}^t - \mathbf{P}\|_{op} \leq \lambda^t,$$

where  $\|\cdot\|_{op}$  denotes the spectral norm. Note that  $\mathbf{W}$  corresponds to some Markov chain's transition matrix, and the parameter  $0 \leq \lambda < 1$  characterizes the speed of convergence to the stationary state.

In this paper, we consider three topologies: ring, star, and full connected graph in Figure 4.

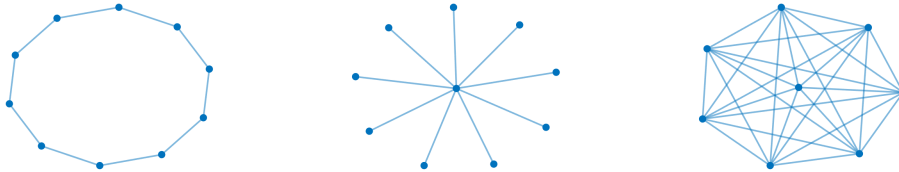

Figure 4: Structures of the connected graph from left to right: ring, star, full connected.

**Definition 7 (Nonexpansive Operator)** *A mapping  $T : \mathbb{X} \rightarrow \mathbb{X}$  is nonexpansive if  $\|Tx - Ty\| \leq \|x - y\|$  holds for all  $x, y \in \mathbb{X}$ .*

We next introduce differential privacy based on KL divergence, which measures the distance between two distributions. The bound given in Definition 8 is useful for establishing the composition theorem.

**Definition 8 (( $\varepsilon, \alpha$ )-Rényi Differential Private Duchi & Rogers (2019))** For distributions  $P$  and  $Q$ ,  $D_\alpha(P\|Q) := \frac{1}{\alpha-1} \log \int (dP/dQ)^\alpha dQ$  is the Rényi  $\alpha$ -divergence. For  $\alpha \geq 1$ ,  $\mathcal{A}$  is  $(\varepsilon, \alpha)$ -Rényi differential private if for all  $\Xi, \Xi'$ ,  $D_\alpha(\mathcal{A}(\Xi)\|\mathcal{A}(\Xi')) \leq \varepsilon$ . By taking  $\alpha = 1$ , we obtain  $\varepsilon$ -KL-privacy. If  $\mathcal{A}$  is  $\varepsilon$ -differential private, then for any  $\alpha \geq 1$ , it also satisfies,

$$D_\alpha(\mathcal{A}(\Xi)\|\mathcal{A}(\Xi')) \leq \min \{2(\alpha-1)\varepsilon^2 + \min \{2, (e^\varepsilon - 1)\} \varepsilon, \varepsilon\}.$$

**Lemma 2 (Mohri et al. (2018))** Suppose  $\{Y_i\}_{i=1}^N$  is a sequence of random variables,  $Y_i \in [-c_i, c_i]$ . Let  $\{X_i\}_{i=1}^N$  be a sequence of random variables such that  $\mathbb{E}[Y_i \mid X_{i-1}, \dots, X_i] \leq C_i$ , where  $\{C_i\}_{i=1}^N$  is sequence of constant real numbers. Then,

$$\mathbb{P} \left( \sum_{i=1}^N Y_i \geq \sum_{i=1}^N C_i + t \sqrt{\sum_{i=1}^N c_i^2} \right) \leq e^{-\frac{t^2}{2}}.$$

**Lemma 3 (Dwork & Rothblum (2016))** For any random variables  $Y, Z$ , we have that  $D_\infty^\delta(Y\|Z) \leq \varepsilon$ ,  $D_\infty^\delta(Z\|Y) \leq \varepsilon$  if and only if there exist r.v.s,  $Y', Z'$  such that  $\Delta(Y\|Y') \leq \frac{\delta}{e^\varepsilon + 1}$ ,  $\Delta(Z\|Z') \leq \frac{\delta}{e^\varepsilon + 1}$ ,  $D_\infty(Y'\|Z') \leq \varepsilon$ ,  $D_\infty(Z'\|Y') \leq \varepsilon$ , where  $D_\infty(X\|Y) = \max_{\nu \in \text{supp}(X)} \left[ \log \frac{P(X \in U)}{P(Y \in U)} \right]$ ,  $D_\infty^\delta(X\|Y) = \max_{U \in \text{supp}(i): P(Y \in U) \geq \delta} \left[ \log \frac{P(X \in U) - \delta}{P(Y \in U)} \right]$ , and  $\Delta(X\|Y) = \max_U |P(X \in U) - P(Y \in U)|$ .

## A.2 PROOF OF MAIN RESULTS

### A.2.1 PROOF OF LEMMA 4

**Lemma 4**  $x^k(m)$  is generated by (1) for a given relaxed parameter  $\alpha_k \in (0, 1]$ . Define  $x^k = \frac{1}{M} \sum_{m=1}^M x^k(m)$  is an average iterate of all local agent,  $m \in \{1, \dots, M\}$ . Under Assumption 3, we have

$$\left[ \sum_{m=1}^M \|x^k(m) - x^k\|^2 \right]^{\frac{1}{2}} \leq 2\sqrt{M}B \sum_{j=0}^{k-1} \alpha_j \lambda^{k-1-j}.$$

*Proof.* Let

$$\mathbf{X}^k := [x^k(1), \dots, x^k(M)]^\top \in \mathbb{R}^{M \times p},$$

$$\Delta^k := \alpha_k [T(x^k(1); \xi_{i_k(1)}) - x^k(1), \dots, T(x^k(M); \xi_{i_k(M)}) - x^k(M)]^\top.$$

The matrix form of (1) is as follows,

$$\mathbf{X}^{k+1} = \mathcal{A}(\mathbf{X}^k) = \mathbf{W}\mathbf{X}^k + \Delta^k,$$

where  $\mathbf{W}$  satisfies Definition 1 and Lemma 1. We then have,

$$(\mathbb{I} - \mathbf{P})\mathbf{X}^{k+1} = (\mathbb{I} - \mathbf{P}) [\mathbf{W}\mathbf{X}^k + \Delta^k].$$

Therefore,

$$\begin{aligned} \|(\mathbb{I} - \mathbf{P})\mathbf{X}^{k+1}\| &\leq \|(\mathbf{W}\mathbf{X}^k + \Delta^k) - (\mathbf{P}\mathbf{W}\mathbf{X}^k)\| + \|\Delta^k\| \\ &\leq \|\mathbf{W}\mathbf{X}^k + \Delta^k - \mathbf{P}\mathbf{W}\mathbf{X}^k\| + \alpha_k \sqrt{M}B \\ &\leq \|\mathbf{W}\mathbf{X}^k - \mathbf{P}\mathbf{W}\mathbf{X}^k\| + 2\alpha_k \sqrt{M}B \\ &= \|(\mathbf{W} - \mathbf{P})(\mathbb{I} - \mathbf{P})\mathbf{X}^k\| + 2\alpha_k \sqrt{M}B \\ &\leq \lambda \|(\mathbb{I} - \mathbf{P})\mathbf{X}^k\| + 2\alpha_k \sqrt{M}B \\ &\leq \lambda^{k+1} \|(\mathbb{I} - \mathbf{P})\mathbf{X}^0\| + 2\sqrt{M}B \sum_{l=0}^k \alpha_l \lambda^{k-l}. \end{aligned}$$

The result of Lemma 4 follows.

## A.2.2 PROOF OF THEOREM 1

Without loss of generality, we assume that two random sets  $\Xi'$  and  $\Xi''$  differ at one point in the first  $N$  samples of agent 1, and the iteration starts with samples selected from this agent. Then with probability,  $1 - \frac{1}{N}$ , the sample selected by D-KM is the same in both  $\Xi'$  and  $\Xi''$ . Note that,

$$\begin{aligned}
& x^{K+1} - y^{K+1} \\
&= \frac{1}{M} \sum_{m=1}^M \left\{ \left[ \sum_{l=1}^M \omega_{ml} x^K(l) - \alpha_K (T(x^K(m); \xi_{i_K(m)}) - x^K(m)) \right] \right. \\
&\quad \left. - \left[ \sum_{l=1}^M \omega_{ml} y^K(l) - \alpha_K (T(y^K(m); \xi_{i_K(m)}) - y^K(m)) \right] \right\} \\
&= \frac{1}{M} \sum_{m=1}^M \{ [x^K - \alpha_K (T(x^K; \xi_{i_K(m)}) - x^K)] - [y^K - \alpha_K (T(y^K; \xi_{i_K(m)}) - y^K)] \} + \varepsilon_K,
\end{aligned}$$

where,

$$\begin{aligned}
\|\varepsilon_K\| &\leq \frac{1}{M} \sum_{m=1}^M \left\{ \sum_{l=1}^M \omega_{ml} \|x^K(l) - x^K\| \right. \\
&\quad \left. + \alpha_K \| (T(x^K(m); \xi_{i_K(m)}) - x^K(m)) - (T(x^K; \xi_{i_K(m)}) - x^K) \| \right\} \\
&\quad + \frac{1}{M} \sum_{m=1}^M \left\{ \sum_{l=1}^M \omega_{ml} \|y^K(l) - y^K\| \right. \\
&\quad \left. + \alpha_K \| (T(y^K(m); \xi_{i_K(m)}) - y^K(m)) - (T(y^K; \xi_{i_K(m)}) - y^K) \| \right\} \\
&\leq \frac{1}{M} \sum_{m=1}^M \left\{ \sum_{l=1}^M \omega_{ml} \|x^K(l) - x^K\| + 2\alpha_K \|x^K(m) - x^K\| \right\} \\
&\quad + \frac{1}{M} \sum_{m=1}^M \left\{ \sum_{l=1}^M \omega_{ml} \|y^K(l) - y^K\| + 2\alpha_K \|y^K(m) - y^K\| \right\} \\
&\leq \frac{1}{M} \left\{ \sum_{l=1}^M \|x^K(l) - x^K\| + 2\alpha_K \sum_{m=1}^M \|x^K(m) - x^K\| \right\} \\
&\quad + \frac{1}{M} \left\{ \sum_{l=1}^M \|y^K(l) - y^K\| + 2\alpha_K \sum_{m=1}^M \|y^K(m) - y^K\| \right\} \\
&\leq \frac{1}{M} \left\{ (1 + 2\alpha_K) \sqrt{M} \left[ \sum_{m=1}^M \|x^K(m) - x^K\|^2 \right]^{\frac{1}{2}} \right\} \\
&\quad + \frac{1}{M} \left\{ (1 + 2\alpha_K) \sqrt{M} \left[ \sum_{m=1}^M \|y^K(m) - y^K\|^2 \right]^{\frac{1}{2}} \right\} \\
&\leq 4(1 + 2\alpha_K) B \sum_{j=0}^{K-1} \alpha_j \lambda^{K-1-j} + 2\lambda^{K+1} (1 + 2\alpha_K) \|(\mathbb{I} - \mathbf{P})\mathbf{X}^0\| / \sqrt{M} \\
&= 4(1 + 2\alpha_K) B \sum_{j=0}^{K-1} \alpha_j \lambda^{K-1-j}. \tag{A1}
\end{aligned}$$

Due to the nonexpansiveness of the operator  $T$ , we have that,

$$\begin{aligned}
& \left\| \frac{1}{M} \sum_{m=1}^M \{ [x^K - \alpha_K (T(x^K; \xi_{i_K(m)}) - x^K)] - [y^K - \alpha_K (T(y^K; \xi_{i_K(m)}) - y^K)] \} \right\| \\
&\leq \|x^K - y^K\| = \delta_K.
\end{aligned}$$

That is,

$$\delta_{K+1} \leq \delta_K + 4(1 + 2\alpha_K)B \sum_{j=0}^{K-1} \alpha_j \lambda^{K-1-j}. \quad (\text{A2})$$

On the other hand, with probability  $\frac{1}{N}$ , dKM selects the one sample to update in which  $\Xi'$  and  $\Xi''$  differ.

$$\begin{aligned} & x^{K+1} - y^{K+1} \\ &= \frac{1}{M} \sum_{m=2}^M \left\{ \left[ \sum_{l=1}^M \omega_{ml} x^K(l) - \alpha_K (T(x^K; \xi_{i_K(m)}) - x^K) \right] \right. \\ & \quad \left. - \left[ \sum_{l=1}^M \omega_{ml} y^K(l) - \alpha_K (T(y^K; \xi_{i_K(m)}) - y^K) \right] \right. \\ & \quad \left. + \frac{1}{M} \left\{ \left[ \sum_{l=1}^M \omega_{1l} x^K(l) - \alpha_K (T(x^K; \xi_{i_K(1)}) - x^K) \right] \right. \right. \\ & \quad \left. \left. - \left[ \sum_{l=1}^M \omega_{1l} y^K(l) - \alpha_K (T(y^K; \xi'_{i_K(1)}) - y^K) \right] \right\} + \mathfrak{S}_K \right\} \\ &= \frac{1}{M} \sum_{m=2}^M \{ [x^K - \alpha_K (T(x^K; \xi_{i_K(m)}) - x^K)] - [y^K - \alpha_K (T(y^K; \xi_{i_K(m)}) - y^K)] \} \\ & \quad + \frac{1}{M} \{ [x^K - \alpha_K (T(x^K; \xi_{i_K(1)}) - x^K)] - [y^K - \alpha_K (T(y^K; \xi'_{i_K(1)}) - y^K)] \} + \mathfrak{S}_K. \end{aligned}$$

From the inequality A1, we have  $\|\mathfrak{S}_K\| \leq 4(1 + 2\alpha_K)B \sum_{j=0}^{K-1} \alpha_j \lambda^{K-1-j}$ . We conclude that

$$\|x^{K+1} - y^{K+1}\| \leq \frac{M-1}{M} \delta_K + \frac{\delta_K + 2\alpha_K B}{M} + 4(1 + 2\alpha_K)B \sum_{j=0}^{K-1} \alpha_j \lambda^{K-1-j}. \quad (\text{A3})$$

Inequalities A2, A3 imply that

$$\mathbb{E} \delta_{K+1} \leq \mathbb{E} \delta_K + \frac{2\alpha_t B}{MN} + 4(1 + 2\alpha_K)B \sum_{j=0}^{K-1} \alpha_j \lambda^{K-1-j},$$

which indicates that,

$$\mathbb{E} \delta_{K+1} \leq \frac{2B \sum_{k=0}^K \alpha_k}{MN} + 4B \sum_{k=0}^K (1 + 2\alpha_k) \sum_{j=0}^{k-1} \alpha_j \lambda^{k-1-j}.$$

## A.2.3 PROOF OF THEOREM 2

Let  $\Xi^{\xi_0}$  be the sample set with size  $MN$  which differs  $\Xi$  at only point  $\xi_0$ . Note that

$$\begin{aligned}
& \mathbb{E}_{\Xi \sim \mathbb{P}^{MN}} \left[ \mathbb{E}_{\mathcal{B}(\Xi)} \left[ \hat{L}(\mathcal{B}(\Xi)) \right] \right] = \mathbb{E}_{\Xi \sim \mathbb{P}^{MN}} \left[ \mathbb{E}_{\mathcal{B}(\Xi)} \left[ \mathbb{E}_{\xi \sim \Xi_m} \left[ \ell(x_{\mathcal{B}(\Xi)}, \xi) \right] \right] \right] \\
&= \mathbb{E}_{\Xi \sim \mathbb{P}^{MN}} \left[ \mathbb{E}_{\xi \sim \Xi} \left[ \mathbb{E}_{\mathcal{B}(\Xi)} \left[ \ell(x_{\mathcal{B}(\Xi)}, \xi_{m_{\mathcal{B}(\Xi)}}) \right] \right] \right] \\
&= \mathbb{E}_{\Xi \sim \mathbb{P}^{MN}} \left[ \mathbb{E}_{\xi \sim \Xi} \left[ \int_0^R \mathbb{P}(\ell(x_{\mathcal{B}(\Xi)}, \xi_{m_{\mathcal{B}(\Xi)}}) > t) dt \right] \right] \\
&= \mathbb{E}_{\Xi \sim \mathbb{P}^{MN}} \left[ \mathbb{E}_{\xi \sim \Xi} \left[ \sum_{m=1}^M \int_0^R \mathbb{P}(\ell(x_{\mathcal{B}(\Xi)}, \xi_m) > t, m_{\mathcal{B}(\Xi)} = m) dt \right] \right] \\
&\leq \mathbb{E}_{\Xi \sim \mathbb{P}^{MN}} \left[ \mathbb{E}_{\xi \sim \Xi, \xi_0 \sim \mathbb{P}} \left[ \sum_{m=1}^M \int_0^R (e^\varepsilon \mathbb{P}(\ell(x_{\mathcal{B}(\Xi^{\xi_0})}, \xi_m) > t, m_{\mathcal{B}(\Xi)} = m) + \delta) dt \right] \right] \\
&\leq \sum_{m=1}^M e^\varepsilon \mathbb{E}_{\Xi \sim \mathbb{P}^{MN}} \left[ \mathbb{E}_{\xi \sim \Xi, \xi_0 \sim \mathbb{P}} \left[ \int_0^R (\mathbb{P}(\ell(x_{\mathcal{B}(\Xi^{\xi_0})}, \xi_m) > t, m_{\mathcal{B}(\Xi)} = m)) dt \right] \right] + M\delta \\
&\leq \sum_{m=1}^M e^\varepsilon \mathbb{E}_{\Xi' \sim \mathbb{P}^{MN-1}} \left[ \mathbb{E}_{\xi_m \sim \mathbb{P}, \xi_0 \sim \mathbb{P}} \left[ \int_0^R (\mathbb{P}(\ell(x_{\mathcal{B}(\Xi' \cup \{\xi_0\})}, \xi_m) > t, m_{\mathcal{B}(\Xi)} = m)) dt \right] \right] + M\delta,
\end{aligned}$$

where the first inequality holds because the algorithm  $\mathcal{B}(\Xi)$  is  $(\varepsilon, \delta)$ -differentially private. Let  $\Xi = \Xi' \cup \{\xi_0\}$ , and  $\xi_m, \xi_0$  are i.i.d following the distribution  $\mathbb{P}$ . We have

$$\begin{aligned}
& \sum_{m=1}^M e^\varepsilon \mathbb{E}_{\Xi' \sim \mathbb{P}^{MN-1}} \left[ \mathbb{E}_{\xi_m \sim \mathbb{P}, \xi_0 \sim \mathbb{P}} \left[ \int_0^R (\mathbb{P}(\ell(x_{\mathcal{B}(\Xi' \cup \{\xi_0\})}, \xi_m) > t, m_{\mathcal{B}(\Xi)} = m)) dt \right] \right] + M\delta \\
&= \sum_{m=1}^M e^\varepsilon \mathbb{E}_{\Xi \sim \mathbb{P}^{MN}} \left[ \mathbb{E}_{\xi \sim \mathbb{P}} \left[ \int_0^R (\mathbb{P}(\ell(x_{\mathcal{B}(\Xi)}, \xi) > t, m_{\mathcal{B}(\Xi)} = m)) dt \right] \right] + M\delta \\
&= e^\varepsilon \mathbb{E}_{\Xi \sim \mathbb{P}^{MN}} \left[ \mathbb{E}_{\xi \sim \mathbb{P}} \left[ \int_0^R (\mathbb{P}(\ell(x_{\mathcal{B}(\Xi)}, \xi) > t)) dt \right] \right] + M\delta \\
&= e^\varepsilon \mathbb{E}_{\Xi \sim \mathbb{P}^{MN}} \left[ \mathbb{E}_{\xi \sim \mathbb{P}} \left[ \mathbb{E}^{\mathcal{B}(\Xi)} [\ell(x_{\mathcal{B}(\Xi)}, \xi)] \right] \right] + M\delta.
\end{aligned}$$

Thus we obtain,

$$\begin{aligned}
& \mathbb{E}_{\Xi \sim \mathbb{P}^{MN}} \left[ \mathbb{E}_{\mathcal{B}(\Xi)} \left[ \hat{L}(\mathcal{B}(\Xi)) \right] \right] \leq e^\varepsilon \mathbb{E}_{\Xi \sim \mathbb{P}^{MN}} \left[ \mathbb{E}_{\mathcal{B}(\Xi)} [L(\mathcal{B}(\Xi))] \right] + M\delta, \\
& - \mathbb{E}_{\Xi \sim \mathbb{P}^{MN}} \left[ \mathbb{E}_{\mathcal{B}(\Xi)} [L(\mathcal{B}(\Xi))] \right] \leq -e^{-\varepsilon} \mathbb{E}_{\Xi \sim \mathbb{P}^{MN}} \left[ \mathbb{E}_{\mathcal{B}(\Xi)} \left[ \hat{L}(\mathcal{B}(\Xi)) \right] \right] + e^{-\varepsilon} M\delta.
\end{aligned}$$

It follows that

$$\begin{aligned}
& \mathbb{E}_{\Xi \sim \mathbb{P}^{MN}} \left[ \mathbb{E}_{\mathcal{B}(\Xi)} \left[ \hat{L}(\mathcal{B}(\Xi)) \right] \right] - \mathbb{E}_{\Xi \sim \mathbb{P}^{MN}} \left[ \mathbb{E}_{\mathcal{B}(\Xi)} [L(\mathcal{B}(\Xi))] \right] \\
& \leq e^{-\varepsilon} M\delta - e^{-\varepsilon} \mathbb{E}_{\Xi \sim \mathbb{P}^{MN}} \left[ \mathbb{E}_{\mathcal{B}(\Xi)} \left[ \hat{L}(\mathcal{B}(\Xi)) \right] \right] + \mathbb{E}_{\Xi \sim \mathbb{P}^{MN}} \left[ \mathbb{E}_{\mathcal{B}(\Xi)} \left[ \hat{L}(\mathcal{B}(\Xi)) \right] \right] \\
& = (1 - e^{-\varepsilon}) \mathbb{E}_{\Xi \sim \mathbb{P}^{MN}} \left[ \mathbb{E}_{\mathcal{B}(\Xi)} \left[ \hat{L}(\mathcal{B}(\Xi)) \right] \right] + e^{-\varepsilon} M\delta \\
& \leq (1 - e^{-\varepsilon}) R + e^{-\varepsilon} M\delta.
\end{aligned}$$

The other side can be similarly obtained. Now we complete the proof.

#### A.2.4 PROOF OF THEOREM 3

Due to  $\hat{L}(\mathcal{B}(\Xi)) \geq 0$ , for any  $\epsilon > 0$ , we have,

$$\begin{aligned} \mathbb{E}_{\Xi \sim \mathbb{P}^{MN}} \left[ \mathbb{E}_{\mathcal{B}(\Xi)} [L(\mathcal{B}(\Xi))] \right] &\geq \mathbb{E}_{\Xi \sim \mathbb{P}^{MN}} \left[ \mathbb{E}_{\mathcal{B}(\Xi)} \left[ L(\mathcal{B}(\Xi)) \mathbb{I}_{\{L(\mathcal{B}(\Xi)) \geq \hat{L}(\mathcal{B}(\Xi)) + \epsilon\}} \right] \right] \\ &\geq \mathbb{E}_{\Xi \sim \mathbb{P}^{MN}} \left[ \mathbb{E}_{\mathcal{B}(\Xi)} \left[ (\hat{L}(\mathcal{B}(\Xi)) + \epsilon) \mathbb{I}_{\{L(\mathcal{B}(\Xi)) \geq \hat{L}(\mathcal{B}(\Xi)) + \epsilon\}} \right] \right]. \end{aligned}$$

Therefore,

$$\begin{aligned} &\mathbb{E}_{\Xi \sim \mathbb{P}^{MN}} \left[ \mathbb{E}_{\mathcal{B}(\Xi)} [L(\mathcal{B}(\Xi))] \right] - \mathbb{E}_{\Xi \sim \mathbb{P}^{MN}} \left[ \mathbb{E}_{\mathcal{B}(\Xi)} [\hat{L}(\mathcal{B}(\Xi))] \right] \\ &\geq \mathbb{E}_{\Xi \sim \mathbb{P}^{MN}} \left[ \mathbb{E}_{\mathcal{B}(\Xi)} \left[ (\hat{L}(\mathcal{B}(\Xi)) + \epsilon) \mathbb{I}_{\{L(\mathcal{B}(\Xi)) \geq \hat{L}(\mathcal{B}(\Xi)) + \epsilon\}} \right] \right] \\ &\quad - \mathbb{E}_{\Xi \sim \mathbb{P}^{MN}} \left[ \mathbb{E}_{\mathcal{B}(\Xi)} \left[ \hat{L}(\mathcal{B}(\Xi)) \mathbb{I}_{\{L(\mathcal{B}(\Xi)) \geq \hat{L}(\mathcal{B}(\Xi)) + \epsilon\}} \right] \right] \\ &\quad - \mathbb{E}_{\Xi \sim \mathbb{P}^{MN}} \left[ \mathbb{E}_{\mathcal{B}(\Xi)} \left[ \hat{L}(\mathcal{B}(\Xi)) \mathbb{I}_{\{L(\mathcal{B}(\Xi)) < \hat{L}(\mathcal{B}(\Xi)) + \epsilon\}} \right] \right] \\ &= \mathbb{E}_{\Xi \sim \mathbb{P}^{MN}} \left[ \mathbb{E}_{\mathcal{B}(\Xi)} \left[ \epsilon \mathbb{I}_{\{L(\mathcal{B}(\Xi)) \geq \hat{L}(\mathcal{B}(\Xi)) + \epsilon\}} \right] \right] \\ &\quad - \mathbb{E}_{\Xi \sim \mathbb{P}^{MN}} \left[ \mathbb{E}_{\mathcal{B}(\Xi)} \left[ \hat{L}(\mathcal{B}(\Xi)) \mathbb{I}_{\{L(\mathcal{B}(\Xi)) < \hat{L}(\mathcal{B}(\Xi)) + \epsilon\}} \right] \right] \\ &\geq \epsilon \cdot \mathbb{P}(L(\mathcal{B}(\Xi)) \geq \hat{L}(\mathcal{B}(\Xi)) + \epsilon) - R \cdot \mathbb{P}(L(\mathcal{B}(\Xi)) \leq \hat{L}(\mathcal{B}(\Xi)) + \epsilon) \\ &= \epsilon - (\epsilon + R) \cdot \mathbb{P}(L(\mathcal{B}(\Xi)) \leq \hat{L}(\mathcal{B}(\Xi)) + \epsilon). \end{aligned} \tag{A4}$$

Note that Theorem 2 indicates

$$\mathbb{E}_{\Xi \sim \mathbb{P}^{MN}} \left[ \mathbb{E}_{\mathcal{B}(\Xi)} [L(\mathcal{B}(\Xi))] \right] - \mathbb{E}_{\Xi \sim \mathbb{P}^{MN}} \left[ \mathbb{E}_{\mathcal{B}(\Xi)} [\hat{L}(\mathcal{B}(\Xi))] \right] \leq (1 - e^{-\epsilon})R + e^{-\epsilon}M\delta.$$

This result combined with equation A4 implies that

$$\mathbb{P}(L(\mathcal{B}(\Xi)) \leq \hat{L}(\mathcal{B}(\Xi)) + \epsilon) \geq \frac{\epsilon - (1 - e^{-\epsilon})R - e^{-\epsilon}M\delta}{\epsilon + R}.$$

#### A.2.5 PROOF OF THEOREM 4

For any subsets  $H, H_1, \dots, H_M$ , with Definition 3, we have that,

$$\begin{aligned} \log \frac{\mathbb{P}_{\Xi} \left( \{\tilde{X}(m)\}_{m=1}^M \in H \right)}{\mathbb{P}_{\Xi'} \left( \{\tilde{X}(m)\}_{m=1}^M \in H \right)} &= \log \prod_{m=1}^M \frac{\mathbb{P}_{\Xi} \left( \tilde{X}(m) \in H_m \right)}{\mathbb{P}_{\Xi'} \left( \tilde{X}(m) \in H_m \right)} \\ &= \sum_{m=1}^M \log \frac{\mathbb{P}_{\Xi} \left( \tilde{X}(m) \in H_m \right)}{\mathbb{P}_{\Xi'} \left( \tilde{X}(m) \in H_m \right)} = \sum_{m=1}^M \log \frac{\mathbb{P}_{\Xi} \left( \tilde{\mathcal{A}}_m(\Xi_m) \in H_m \mid \tilde{X}^0(m) \right)}{\mathbb{P}_{\Xi'} \left( \tilde{\mathcal{A}}_m(\Xi'_m) \in H_m \mid \tilde{X}^0(m) \right)} \end{aligned}$$

And, we have,

$$\begin{aligned} \mathbb{E}_{\Xi} \left\{ \log \left( \frac{\mathbb{P}(\tilde{\mathcal{A}}_m(\Xi) \in H_m)}{\mathbb{P}(\tilde{\mathcal{A}}_m(\Xi') \in H_m)} \right) \mid \tilde{X}^0(m) \right\} &\leq D_{KL} \left( \tilde{\mathcal{A}}(\Xi) \parallel \tilde{\mathcal{A}}(\Xi') \right) \\ &\leq \min \{ \min \{ 2, e^{\epsilon_m} - 1 \} \epsilon_m, \epsilon_m \} := C_{KL}(m). \end{aligned}$$

Based on Lemma 2, we have that,

$$\mathbb{P} \left( \sum_{m=1}^M \log \left( \frac{\mathbb{P}(\tilde{\mathcal{A}}_m(\Xi) \in H_m)}{\mathbb{P}(\tilde{\mathcal{A}}_m(\Xi') \in H_m)} \right) \right) \geq \sum_{m=1}^M C_{KL}(m) + t \cdot \sqrt{\sum_{m=1}^M \epsilon_m^2} \leq e^{-\frac{t^2}{2}}.$$

Let  $\tilde{\delta} = e^{-\frac{t^2}{2}}$ , that is,  $t = \sqrt{2 \log \frac{1}{\tilde{\delta}}}$ ,  $\forall \tilde{\delta} > 0$ . It follows

$$\mathbb{P} \left( \sum_{m=1}^M \log \left( \frac{\mathbb{P}(\tilde{\mathcal{A}}_m(\Xi) \in H_m)}{\mathbb{P}(\tilde{\mathcal{A}}_m(\Xi') \in H_m)} \right) \geq \sum_{m=1}^M C_{kL}(m) + \sqrt{2 \log \frac{1}{\tilde{\delta}}} \cdot \sqrt{\sum_{m=1}^M \varepsilon_m^2} \right) \leq \tilde{\delta}.$$

Therefore,  $\{\tilde{X}(m)\}_{m=1}^M$  is  $(\varepsilon', \tilde{\delta})$ -pDP with  $\varepsilon' = \sum_{m=1}^M C_{kL}(m) + \sqrt{(2 \log \frac{1}{\tilde{\delta}}) \left( \sum_{m=1}^M \varepsilon_m^2 \right)}$ .

Since  $\{\tilde{x}^k(m)\}_{k=0}^K$  is  $(\varepsilon_m, \delta_m)$ -DP, for each  $m = 1, \dots, M$ . Based on Lemma 3, we have that there exists r.v.s.  $\tilde{Y}_{\Xi}(m)$ ,  $\tilde{Z}_{\Xi'}(m)$ , such that,

$$\Delta \left( \tilde{X}_{\Xi}(m) \| \tilde{Y}_{\Xi}(m) \right) \leq \frac{\delta_m}{e^{\varepsilon_m} + 1}, \quad \Delta \left( \tilde{X}_{\Xi'}(m) \| \tilde{Z}_{\Xi'}(m) \right) \leq \frac{\delta_m}{e^{\varepsilon_m} + 1}$$

$$D_{\infty} \left( \tilde{Y}_{\Xi}(m) \| \tilde{Z}_{\Xi'}(m) \right) \leq \varepsilon_m, \quad D_{\infty} \left( \tilde{Z}_{\Xi'}(m) \| \tilde{Y}_{\Xi}(m) \right) \leq \varepsilon_m.$$

Since  $\{\tilde{X}(m)\}_{m=1}^M$  is  $\varepsilon'$ -pDP, we need to prove that,

$$\prod_{m=1}^M \mathbb{P} \left( \tilde{X}_{\Xi}(m) \in H_m \right) \leq e^{\varepsilon'} \prod_{m=1}^M \mathbb{P} \left( \tilde{X}_{\Xi'}(m) \in H_m \right) + \delta'.$$

Note that,

$$\mathbb{P} \left( \tilde{Y}_{\Xi}(m) \in H_i \right) \leq \min \left\{ e^{\varepsilon_m}, \frac{1}{\mathbb{P} \left( \tilde{Z}_{\Xi'}(m) \in H_m \right)} \right\} \mathbb{P} \left( \tilde{Z}_{\Xi'}(m) \in H_m \right)$$

which indicates that,

$$\prod_{m=1}^M \mathbb{P} \left( \tilde{Y}_{\Xi}(m) \in H_i \right) \leq \prod_{m=1}^M \min \left\{ e^{\varepsilon_m}, \frac{1}{\mathbb{P} \left( \tilde{Z}_{\Xi'}(m) \in H_m \right)} \right\} \mathbb{P} \left( \tilde{Z}_{\Xi'}(m) \in H_m \right).$$

**Case 1:**  $\prod_{m=1}^M \left\{ e^{\varepsilon_m}, \frac{1}{\mathbb{P} \left( \tilde{Z}_{\Xi'}(m) \in H_m \right)} \right\} \leq e^{\varepsilon'}$

$$\begin{aligned} & \prod_{m=1}^M \mathbb{P} \left( \tilde{Y}_{\Xi}(m) \in H_m \right) \\ & \leq \prod_{m=1}^M \min \left\{ e^{\varepsilon_m}, \frac{1}{\mathbb{P} \left( \tilde{Z}_{\Xi'}(m) \in H_m \right)} \right\} \mathbb{P} \left( \tilde{Z}_{\Xi'}(m) \in H_m \right) \\ & + \prod_{m=1}^M \min \left\{ e^{\varepsilon_m}, \frac{1}{\mathbb{P} \left( \tilde{Z}_{\Xi'}(m) \in H_m \right)} \right\} \mathbb{P} \left( \tilde{X}_{\Xi'}(m) \in H_m \right) \\ & - \prod_{m=1}^M \min \left\{ e^{\varepsilon_m}, \frac{1}{\mathbb{P} \left( \tilde{Z}_{\Xi'}(m) \in H_m \right)} \right\} \left\{ \mathbb{P} \left( \tilde{Z}_{\Xi'}(m) \in H_m \right) - \frac{\delta_m}{1 + e^{\varepsilon_m}} \right\}. \end{aligned}$$

Because

$$\left\{ \mathbb{P} \left( \tilde{Z}_{\Xi'}(m) \in H_m \right) - \frac{\delta_m}{1 + e^{\varepsilon_m}} \right\} \leq \mathbb{P} \left( \tilde{X}_{\Xi'}(m) \in H_m \right)$$

$$\begin{aligned}
& \prod_{m=1}^M \min \left\{ e^{\varepsilon_m}, \frac{1}{\mathbb{P}(\tilde{Z}_{\Xi'}(m) \in H_m)} \right\} \mathbb{P}(\tilde{X}_{\Xi'}(m) \in H_m) \\
& - \prod_{m=1}^M \min \left\{ e^{\varepsilon_m}, \frac{1}{\mathbb{P}(\tilde{Z}_{\Xi'}(m) \in H_m)} \right\} \left\{ \mathbb{P}(\tilde{Z}_{\Xi'}(m) \in H_m) - \frac{\delta_m}{1 + e^{\varepsilon_m}} \right\} \\
& \leq 1 - \prod_{m=1}^M \left\{ 1 - \min \left\{ e^{\varepsilon_m}, \frac{1}{\mathbb{P}(\tilde{Z}_{\Xi'}(m) \in H_m)} \right\} \frac{\delta_m}{1 + e^{\varepsilon_m}} \right\} := \Delta_1.
\end{aligned}$$

We have that,

$$\prod_{m=1}^M \mathbb{P}(\tilde{Y}_{\Xi}(m) \in H_m) \leq \prod_{m=1}^M \min \left\{ e^{\varepsilon_m}, \frac{1}{\mathbb{P}(\tilde{Z}_{\Xi'}(m) \in H_m)} \right\} \mathbb{P}(\tilde{X}_{\Xi'}(m) \in H_m) + \Delta_1.$$

Combing the inequality  $\mathbb{P}(\tilde{Y}_{\Xi}(m) \in H_m) \geq \mathbb{P}(\tilde{X}_{\Xi}(m) \in H_m) - \frac{\delta_m}{1 + e^{\varepsilon_m}}$ . We have,

$$\begin{aligned}
& \prod_{m=1}^M \mathbb{P}(\tilde{X}_{\Xi}(m) \in H_m) \\
& \leq \prod_{m=1}^M \min \left\{ e^{\varepsilon_m}, \frac{1}{\mathbb{P}(\tilde{Z}_{\Xi'}(m) \in H_m)} \right\} \mathbb{P}(\tilde{X}_{\Xi'}(m) \in H_m) + \Delta_1 + \prod_{m=1}^M \frac{\delta_m}{1 + e^{\varepsilon_m}} \\
& \leq e^{\varepsilon'} \prod_{m=1}^M \mathbb{P}(\tilde{X}_{\Xi'}(m) \in H_m) + \Delta_1 \\
& \quad + \prod_{m=1}^M \mathbb{P}(\tilde{X}_{\Xi}(m) \in H_m) - \prod_{m=1}^M \left\{ \mathbb{P}(\tilde{X}_{\Xi}(m) \in H_m) - \frac{\delta_m}{1 + e^{\varepsilon_m}} \right\} \\
& \leq e^{\varepsilon'} \prod_{m=1}^M \mathbb{P}(\tilde{X}_{\Xi'}(m) \in H_m) + \Delta_1 + 1 - \prod_{m=1}^M \left( 1 - \frac{\delta_m}{1 + e^{\varepsilon_m}} \right).
\end{aligned}$$

That is,  $\delta' = 1 - \prod_{m=1}^M \left( 1 - \frac{\delta_m}{1 + e^{\varepsilon_m}} \right) + \Delta_1$ .

**Case 2:**  $\prod_{m=1}^M \left\{ e^{\varepsilon_m}, \frac{1}{\mathbb{P}(\tilde{Z}_{\Xi'}(m) \in H_m)} \right\} > e^{\varepsilon'}$

There exists a sequence of real numbers  $\{a_m\}_{m=1}^M$ , such that,

$$e^{a_m} \leq \min \left\{ e^{\varepsilon_m}, \frac{1}{\mathbb{P}(\tilde{Z}_{\Xi'}(m) \in H_m)} \right\}, \quad \sum_{m=1}^M a_m = \varepsilon'.$$

Note that

$$\begin{aligned}
& \prod_{m=1}^M \mathbb{P}(\tilde{Y}_{\Xi}(m) \in H_m) \\
& \leq \prod_{m=1}^M \min \left\{ e^{\varepsilon_m}, \frac{1}{\mathbb{P}(\tilde{Z}_{\Xi'}(m) \in H_m)} \right\} \mathbb{P}(\tilde{Z}_{\Xi'}(m) \in H_m) \\
& \quad + \prod_{m=1}^M e^{a_m} \mathbb{P}(\tilde{X}_{\Xi'}(m) \in H_m) - \prod_{m=1}^M e^{a_m} \left\{ \mathbb{P}(\tilde{Z}_{\Xi'}(m) \in H_m) - \frac{\delta_m}{1 + e^{\varepsilon_m}} \right\}.
\end{aligned}$$

On the other hand,

$$\begin{aligned} & \prod_{m=1}^M e^{a_m} \mathbb{P}(\tilde{Z}_{\Xi'}(m) \in H_M) - \prod_{m=1}^M e^{a_m} \left\{ \mathbb{P}(\tilde{Z}_{\Xi'}(m) \in H_m) - \frac{\delta_m}{1 + e^{\varepsilon_m}} \right\} \\ & \leq 1 - \prod_{m=1}^M \left\{ 1 - e^{a_m} \frac{\delta_m}{1 + e^{\varepsilon_m}} \right\} := \Delta_2. \end{aligned}$$

which indicates,

$$\prod_{m=1}^M \mathbb{P}(\tilde{Y}_{\Xi}(m) \in H_m) \leq \prod_{m=1}^M e^{a_m} \mathbb{P}(\tilde{X}_{\Xi'}(m) \in H_m) + \Delta_2.$$

In further,

$$\prod_{m=1}^M \mathbb{P}(\tilde{Y}_{\Xi}(m) \in H_m) \geq \prod_{m=1}^M \left\{ \mathbb{P}(\tilde{X}_{\Xi}(m) \in H_m) - \frac{\delta_m}{1 + e^{\varepsilon_m}} \right\}$$

$$\prod_{m=1}^M \left\{ \mathbb{P}(\tilde{X}_{\Xi}(m) \in H_m) - \frac{\delta_m}{1 + e^{\varepsilon_m}} \right\} \leq \prod_{m=1}^M e^{a_m} \mathbb{P}(\tilde{X}_{\Xi'}(m) \in H_m) + \Delta_2.$$

In general,

$$\begin{aligned} & \prod_{m=1}^M \mathbb{P}(\tilde{X}_{\Xi}(m) \in H_i) \\ & \leq \prod_{m=1}^M e^{a_m} \mathbb{P}(\tilde{X}_{\Xi'}(m) \in H_m) + \Delta_2 \\ & \quad - \left\{ \prod_{m=1}^M \left[ \mathbb{P}(\tilde{X}_{\Xi}(m) \in H_m) - \frac{\delta_m}{1 + e^{\varepsilon_m}} \right] \right\} + \prod_{m=1}^M \mathbb{P}(\tilde{X}_{\Xi}(m) \in H_m) \\ & \leq e^{\varepsilon'} \prod_{m=1}^M \mathbb{P}(\tilde{X}_{\Xi'}(m) \in H_m) + \Delta_2 + \left\{ 1 - \prod_{m=1}^M (1 - \frac{\delta_m}{1 + e^{\varepsilon_i}}) \right\} \end{aligned}$$

Let  $\delta' = 1 - \left\{ \prod_{m=1}^M (1 - e^{a_m} \frac{\delta_m}{1 + e^{\varepsilon_m}}) \right\} + \left\{ 1 - \prod_{m=1}^M (1 - \frac{\delta_m}{1 + e^{\varepsilon_m}}) \right\}$ .

Thus, we have  $\varepsilon' = \min \{\varepsilon_1, \varepsilon_2, \varepsilon_3\}$ , where,

$$\begin{aligned} \varepsilon_1 &= \sum_{m=1}^M \varepsilon_m, \quad \varepsilon_2 = \sum_{m=1}^M C_{KL}(m) + \sqrt{2 \log(\frac{1}{\delta'}) (\sum_{m=1}^M \varepsilon_m^2)}, \\ \varepsilon_3 &= \sum_{m=1}^M \frac{(e^{\varepsilon_m} - 1)\varepsilon_m}{e^{\varepsilon_m} + 1} + \sqrt{\sum_{m=1}^M 2\varepsilon_m^2 \log \left( e + \frac{\sqrt{\sum_{m=1}^M \varepsilon_m^2}}{\tilde{\delta}} \right)}. \end{aligned}$$

## A.2.6 PROOF OF THEOREM 5

Denote  $x_m^k := x^k(m)$ ,  $x^{v,k}$  as the  $v$ -th element of  $x^k \in \mathbb{R}^p$ . We know that

$$\begin{aligned}
\left\| \mathbf{W} \left( \mathbf{X}^k - \tilde{\mathbf{X}}^k \right) \right\|_F^2 &= \sum_{m=1}^M \left\| \sum_{l=1}^M w_{ml} (x_l^k - \tilde{x}_l^k) \right\|^2 = \sum_{v=1}^p \sum_{m=1}^M \left\| \sum_{l=1}^M w_{ml} (x_l^{v,k} - \tilde{x}_l^{v,k}) \right\|^2 \\
&= \sum_{v=1}^p \sum_{m=1}^M \sigma_{k,m}^2 \left( \sum_{l=1}^M w_{ml}^2 \right) \left\{ \frac{\sum_{l=1}^M w_{ml} \left[ (x_l^{v,k} - \tilde{x}_l^{v,k}) - \mu_{k,m}^v \right] + \sum_{l=1}^M w_{ml} \mu_{k,l}^v}{\sigma_{k,m} \sqrt{\sum_{l=1}^M w_{ml}^2}} \right\}^2 \\
&\leq \sum_{v=1}^p \sum_{m=1}^M \sigma_{k,m}^2 \left( \sum_{l=1}^M w_{ml}^2 \right) \left\{ \frac{\sum_{l=1}^M w_{ml} \left[ (x_l^{v,k} - \tilde{x}_l^{v,k}) - \mu_{k,m}^v \right]}{\sigma_{k,m} \sqrt{\sum_{l=1}^M w_{ml}^2}} \right\}^2 + \mu^2 p M \cdot \sum_{m=1}^M \sum_{l=1}^M w_{ml}^2 \\
&\quad + \sum_{v=1}^p \sum_{m=1}^M \left( \sum_{l=1}^M w_{ml}^2 \right) \frac{\sum_{l_1=1}^M \sum_{l_2=1}^M w_{ml_1} w_{ml_2} \mu_{k,l_2}^v \left[ (x_{l_1}^{v,k} - \tilde{x}_{l_1}^{v,k}) - \mu_{k,l_1}^v \right]}{\sqrt{\sum_{l_1=1}^M w_{ml_1}^2} \sqrt{\sum_{l_2=1}^M w_{ml_2}^2}}.
\end{aligned}$$

The last inequality holds since  $\sum_{v=1}^p \left( \mu_{k,l}^v \right)^2 \leq p \mu^2$ . Considering that the weight difference is normally distributed,

$$(x_m^k - \tilde{x}_m^k) \sim \mathcal{N}(\mu_{k,m}, \sigma_{k,m}^2 I_p), \quad m = 1, \dots, M,$$

with  $\mu_{k,m}$  satisfying  $\|\mu_{k,m}\|_2^2 \leq p \mu^2$  and  $\sigma_{k,m}^2 \in \mathbb{R}$  being bounded by  $\sigma^2$ , we obtain,

$$\frac{\sum_{l=1}^M w_{ml} \left[ (x_l^{v,k} - \tilde{x}_l^{v,k}) - \mu_{k,m}^v \right]}{\sigma_{k,m} \sqrt{\sum_{l=1}^M w_{ml}^2}} \stackrel{i.i.d.}{\sim} \mathcal{N}(0, 1).$$

It follows that

$$\left\{ \frac{\sum_{l=1}^M w_{ml} \left[ (x_l^{v,k} - \tilde{x}_l^{v,k}) - \mu_{k,m}^v \right]}{\sigma_{k,m} \sqrt{\sum_{l=1}^M w_{ml}^2}} \right\}^2 \sim \mathcal{X}^2(1), \quad l = 1, \dots, M.$$

Further,  $\forall l, \mathbb{E} \left[ (x_l^{v,k} - \tilde{x}_l^{v,k}) - \mu_{k,l}^v \right] = 0$ , therefore, we have,

$$\mathbb{E} \left[ \sum_{v=1}^p \sum_{m=1}^M \left( \sum_{l=1}^M w_{ml}^2 \right) \frac{\sum_{l_1=1}^M \sum_{l_2=1}^M w_{ml_1} w_{ml_2} \mu_{k,l_2}^v \left[ (x_{l_1}^{v,k} - \tilde{x}_{l_1}^{v,k}) - \mu_{k,l_1}^v \right]}{\sqrt{\sum_{l_1=1}^M w_{ml_1}^2} \sqrt{\sum_{l_2=1}^M w_{ml_2}^2}} \right] = 0,$$

As a consequence,

$$\mathbb{E} \left[ \left\| \mathbf{W} \left( \mathbf{X}^k - \tilde{\mathbf{X}}^k \right) \right\|_F^2 \right] \leq p \sigma^2 \sum_{m=1}^M \lambda_m^2 + p \mu^2 \sum_{m=1}^M \lambda_m^2 \leq p (\sigma^2 + \mu^2) [1 + (M-1) \lambda^2].$$

## A.2.7 PROOF OF THEOREM 6

We discuss the cases by the value of  $z$ . Note that, for any  $S \in \mathbb{R}$ ,  $z \in (-\infty, -\frac{\Delta}{2})$ ,  $\mathbb{P}_z(z) \leq \mathbb{P}_z(z+v)$ . Therefore,  $\mathbb{P}_z(S) - e^\varepsilon \mathbb{P}_z(S+v) \leq 0 \leq \delta$ .

If  $z \in [-\frac{\Delta}{2}, 0)$ ,  $z+v \in [-\frac{\Delta}{2}, 0)$ , then  $0 \leq v < \frac{\Delta}{2}$ ,

$$\frac{p_z(z)}{p_z(z+v)} = e^{\frac{v^2+2vz}{\sigma^2}} \leq 1 \leq e^\varepsilon.$$

Therefore,  $\mathbb{P}_z(S) - e^\varepsilon \mathbb{P}_z(S+v) = \int_S (p_z(z) - e^\varepsilon p_z(z+v)) dz \leq 0 \leq \delta$ .

If  $z \in [-\frac{\Delta}{2}, 0)$ ,  $z + v \in [0, \Delta)$ ,  $e^{\frac{v^2+2vz}{\sigma^2}} \leq e^{\frac{\Delta^2}{\sigma^2}} \leq e^\varepsilon$ . Therefore,  $\mathbb{P}_z(S) - e^\varepsilon \mathbb{P}_z(S + v) \leq \delta$ .

For any  $z \in [0, A - \Delta]$ , we still have  $\frac{p_z(z)}{p_z(z+v)} \leq \frac{p_z(z)}{p_z(z+\Delta)} \leq e^\varepsilon$ .

For any  $z \in [A - \Delta, +\infty)$ ,

$$\begin{aligned} \mathbb{P}_z(S) - e^\varepsilon \mathbb{P}_z(S + v) &\leq \mathbb{P}_z(A - \Delta) - e^\varepsilon \mathbb{P}_z(A - \Delta + v) \\ &= \int_{A-\Delta}^{A-\Delta+v} p_z(z) dz + \int_{A-\Delta+v}^{+\infty} p_z(z) dz - e^\varepsilon \int_{A-\Delta+v}^{+\infty} p_z(z) dz \\ &= \int_{A-\Delta}^{A-\Delta+v} p_z(z) dz + \int_{A-\Delta+v}^{+\infty} (1 - e^\varepsilon) p_z(z) dz \\ &\leq \int_{A-\Delta}^{A-\Delta+v} p_z(z) dz \leq \int_{A-\Delta}^A p_z(z) dz = \delta. \end{aligned}$$

Based on the above inequality, for any  $S \in \mathbb{R}$ ,  $|d| \leq \Delta$ ,  $\mathbb{P}_z(S) - e^\varepsilon \mathbb{P}_z(S + d) \leq \delta$ , we have the conclusion of the theorem.

### A.3 TRUNCATED GENERALIZED GAUSSIAN MECHANISMS

In this section, we give more details to determine an appropriate bounding parameter in noise addition. Given the privacy budget  $\varepsilon$  and  $\delta$ , we are interested in deriving the minimum amount of noise added to shared parameters to achieve the highest utility while preserving differential privacy. Motivated by the observation that under  $(\varepsilon, \delta)$ -differential privacy, the decay rate defined as  $p(z)/p(z + \Delta)$  shall be as high as possible without exceeding  $e^\varepsilon$ , except for a set of points with a probability mass  $\delta$  [Mironov (2017)]. We then truncate a probability density function (pdf) with an appropriate normalization factor to restore the integral over the truncated span to be 1 and calculate an appropriate scaling parameter. The required scaling parameter depends upon the privacy parameter  $(\varepsilon, \delta)$ . Specifically,

- The probability mass  $\delta$  is equal to the area under the pdf in the last interval with length  $\Delta$  over the support of pdf, i.e., the interval  $[A - \Delta, A]$ .
- The decay rate  $\frac{p(z)}{p(z+\Delta)}$  is exactly  $e^\varepsilon$  for  $z \in [0, A - \Delta)$ .

The parameter  $A$  is then derived by solving the equations  $\int_{-A}^A p(z) dz = 1$  and  $\int_{A-\Delta}^A p(z) dz = \delta$ .

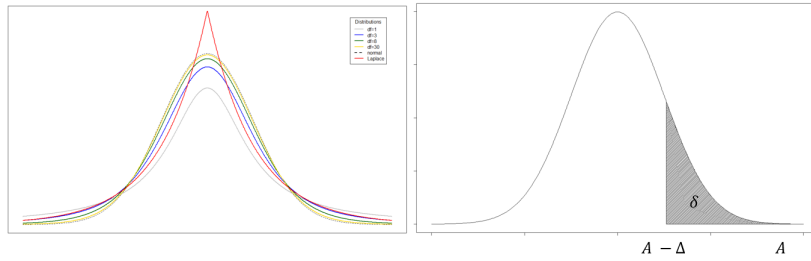

Figure 5: Noise probability density function.

We address that the truncated GG mechanisms can be extended to the case  $b \geq 3$  in practice to preserve a differential privacy guarantee. The major challenge is to calculate the boundary parameter, as indicated by  $A$ , given the pre-specific parameters, such as  $\Delta$ ,  $\sigma$ , and  $\varepsilon$ . As it requires solving multiple equations or using the approximation methods thereof that could limit its utility in the real application. This paper thus limits the discussion to the case  $b = 1, 2$  which is relatively more applicable in practice.
